# Supplementary material for: A Biomedical Investigation of the Hepatoprotective Effect of Radix salviae miltiorrhizae and Network Pharmacology-Based Prediction of the Active Compounds and Molecular Targets
Source: PubMed Central journal article supplement (PMC5372635; doi:10.3390/ijms18030620), 2017-03-13
Supplement: ijms-18-00620-s001.pdf [file ijms-18-00620-s001.pdf]

**Table S1.** The information of 29 potential hepatoprotective targets in Danshen.

| <b>Target Gene</b>             | <b>Target Protein</b>                                                               | <b>Organism</b> | <b>Roles in Hepatoprotective Effects</b>                                                |
|--------------------------------|-------------------------------------------------------------------------------------|-----------------|-----------------------------------------------------------------------------------------|
| <i>CYP1A2</i>                  | cytochrome P450, family 1, subfamily A, polypeptide 2                               | Homo sapiens    | Oxidizes a variety of structurally unrelated compounds, including steroids, fatty acids |
| <i>CYP2B6</i>                  | cytochrome P450, family 2, subfamily B, polypeptide 6                               | Homo sapiens    | Oxidizes a variety of structurally unrelated compounds, including steroids, fatty acids |
| <i>CYP1B1</i>                  | cytochrome P450, family 1, subfamily B, polypeptide 1                               | Homo sapiens    | Oxidizes a variety of structurally unrelated compounds, including steroids, fatty acids |
| <i>MMP2</i>                    | matrix metalloproteinase 2                                                          | Homo sapiens    | Tissue repair and induce interstitial fibrosis                                          |
| <i>PPAR<math>\alpha</math></i> | peroxisome proliferator-activated receptor alpha                                    | Homo sapiens    | Key regulator of lipid metabolism                                                       |
| <i>NFKBIA</i>                  | nuclear factor of kappa light polypeptide gene enhancer in B-cells inhibitor, alpha | Homo sapiens    | On cellular stimulation by immune and proinflammatory responses                         |
| <i>AHSA1</i>                   | activator of heat shock 90 kDa protein ATPase homolog 1                             | Homo sapiens    | Involve in Grb2-p38 MAPK signaling pathway in fibrosis                                  |
| <i>CYP1A2</i>                  | cytochrome P450, family 1, subfamily A, polypeptide 2                               | Homo sapiens    | Oxidizes a variety of structurally unrelated compounds, including steroids, fatty acids |
| <i>NQO1</i>                    | NAD(P)H dehydrogenase, quinone 1                                                    | Homo sapiens    | Involve in alcohol detoxification pathways                                              |
| <i>HMOX1</i>                   | heme oxygenase (decycling) 1                                                        | Homo sapiens    | Alleviate liver inflammation and reduced oxidative stress                               |
| <i>ICAM-1</i>                  | intercellular adhesion molecule 1                                                   | Homo sapiens    | Mediate adhesive interaction in fibrosis process                                        |
| <i>MAPK1</i>                   | mitogen-activated protein kinase 1                                                  | Homo sapiens    | Regulate cytoskeletal rearrangements in fibrosis process                                |
| <i>PRKCB</i>                   | protein kinase C, beta                                                              | Homo sapiens    | Regulate oxidative stress-induced cell damage                                           |
| <i>ACTA2</i>                   | actin, alpha 2, smooth muscle, aorta                                                | Homo sapiens    | Involve in myofibroblast cell motility during wound healing in liver                    |
| <i>SPZ1</i>                    | spermatogenic leucine zipper 1                                                      | Homo sapiens    | The transcriptional factors of liver fatty                                              |

|               |                                                              |              |                                                                                              |
|---------------|--------------------------------------------------------------|--------------|----------------------------------------------------------------------------------------------|
|               |                                                              |              | acid binding protein                                                                         |
| <i>COL1A1</i> | collagen, type I, alpha 1                                    | Homo sapiens | Transcriptional repressor of the collagen                                                    |
| <i>BCL2</i>   | B-cell CLL/lymphoma 2                                        | Homo sapiens | Regulate the response to mitochondrial damage and related oxidative damage                   |
| <i>CCND1</i>  | cyclin D1                                                    | Homo sapiens | Functions as a mediator of $\beta$ -catenin during hepatocarcinogenesis                      |
| <i>HERC5</i>  | HECT and RLD domain containing E3 ubiquitin protein ligase 5 | Homo sapiens | Acts as a positive regulator of innate antiviral response in liver cells                     |
| <i>AKT1</i>   | v-akt murine thymoma viral oncogene homolog 1                | Homo sapiens | Regulate lipid metabolism                                                                    |
| <i>CDKN1A</i> | cyclin-dependent kinase inhibitor 1A                         | Homo sapiens | Regulate hepatic cell cycle in hepatocarcinogenesis                                          |
| <i>EIF6</i>   | eukaryotic translation initiation factor 6                   | Homo sapiens | Regulate hepatocarcinogenesis by mediating cellular response to DNA damage.                  |
| <i>CASP3</i>  | caspase 3                                                    | Homo sapiens | Apoptosis inhibitory protein in hepatocarcinogenesis                                         |
| <i>COL7A1</i> | collagen, type VII, alpha 1                                  | Homo sapiens | Regulate fibrosis by impacts on extracellular matrix (ECM) proteins such as type IV collagen |
| <i>COL3A1</i> | collagen, type III, alpha 1                                  | Homo sapiens | Regulate fibrosis by impacts on extracellular matrix (ECM) proteins such as type IV collagen |
| <i>TGFB1</i>  | transforming growth factor, beta 1                           | Homo sapiens | Regulate liver cancer cells proliferation                                                    |
| <i>TIMP1</i>  | TIMP metalloproteinase inhibitor 1                           | Homo sapiens | Tissue repair and induce interstitial fibrosis                                               |
| <i>SOD1</i>   | superoxide dismutase 1                                       | Homo sapiens | Destroys radicals which are normally produced within the cells, such as oxidants             |
| <i>RELA</i>   | v-rel reticuloendotheliosis viral oncogene homolog A         | Homo sapiens | Involve in hepatic inflammation                                                              |
